# Supplementary material for: Monosomy 3 Is Linked to Resistance to MEK Inhibitors in Uveal Melanoma
Source: MDPI journal article supplement (doi:10.3390/ijms22136727), 2021-06-23
Supplement: s1 [file s1]

## **Supplementary Materials**

### **Monosomy 3 is linked to resistance to MEK inhibitors in uveal melanoma**

**Svenja Mergener<sup>1,2,3</sup>, Jens T. Siveke<sup>2,3</sup> and Samuel Peña-Llopis<sup>1,2,3,\*</sup>**

<sup>1</sup>Translational Genomics in Solid Tumors, German Cancer Consortium (DKTK) and German Cancer Research Center (DKFZ) at the University Hospital Essen, Hufelandstrasse 55, D-45147 Essen, Germany.

<sup>2</sup>Division of Solid Tumor Translational Oncology, German Cancer Consortium (DKTK) and German Cancer Research Center (DKFZ), Heidelberg, Germany.

<sup>3</sup>Bridge Institute of Experimental Tumor Therapy, West German Cancer Center, University Hospital Essen, Essen, Germany.

\*Correspondence: [Samuel.Pena-Llopis@dkfz.de](mailto:Samuel.Pena-Llopis@dkfz.de)

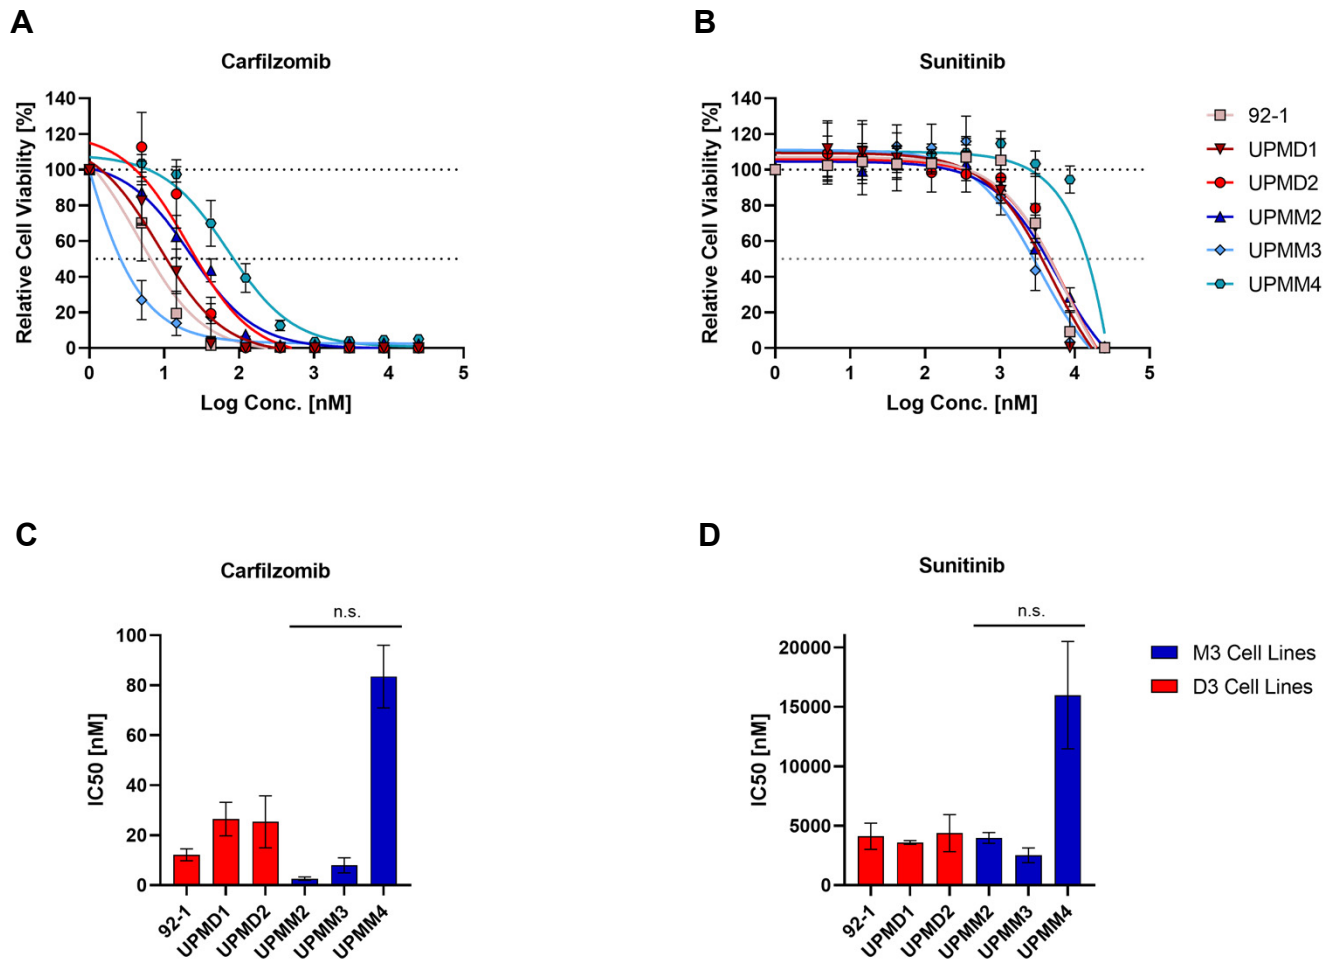

**Figure S1. MEKi resistance pattern of M3 cell lines is not recapitulated in experiments with other compounds.** Dose-response curves of uveal melanoma cell lines with M3 (blue symbols) and D3 (red symbols) that were treated with carfilzomib (**A**) or sunitinib (**B**) at different concentrations (from 5 nM to 25  $\mu$ M) for 5 days and IC<sub>50</sub> values for each cell line (**C**, **D**). Cell viability is expressed as normalized values in percentage to DMSO controls. Summarized results of three independent experiments are shown. Data are average  $\pm$  SD.

BAP1

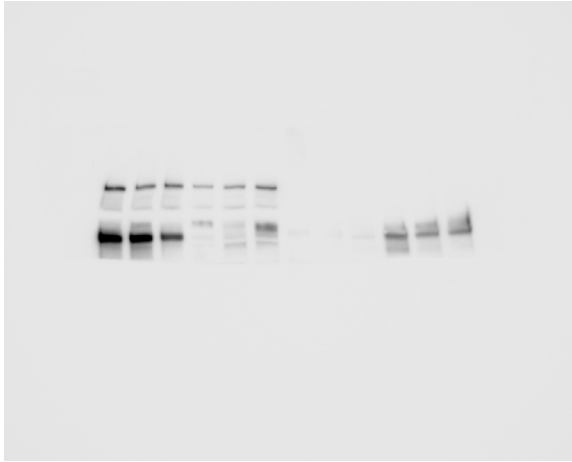

$\beta$ -Actin

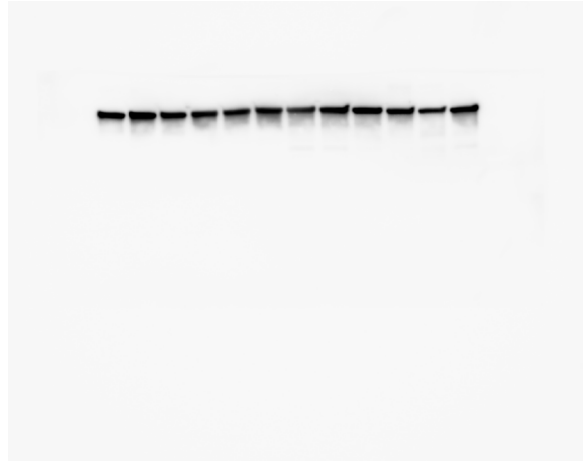

**Figure S2. Uncropped western blots for Fig. 2.** Original pictures of the western blots shown in Fig. 2.

BAP1

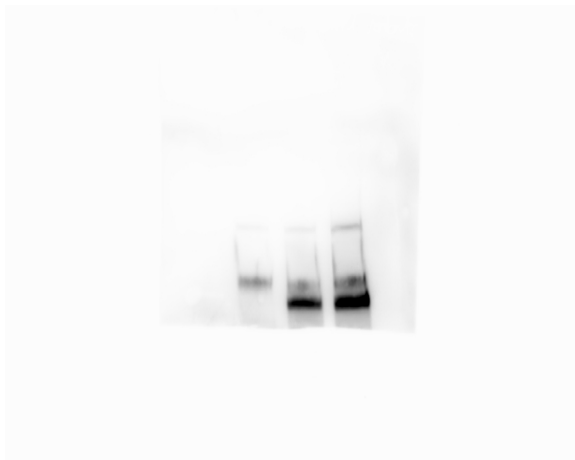

$\beta$ -Actin

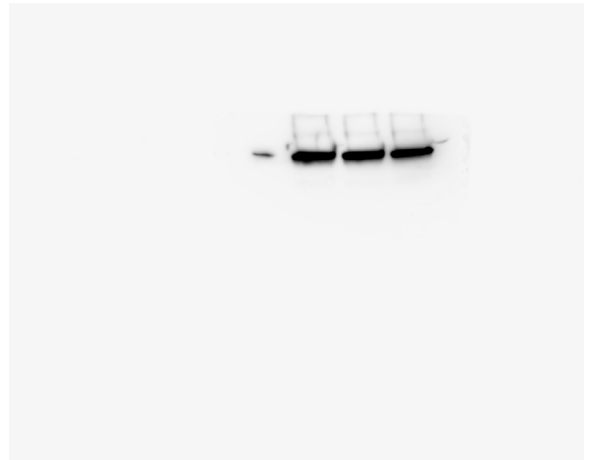

**Figure S3. Uncropped western blots for Fig. 3.** Original pictures of the western blots shown in Fig. 3.

pMEK1/2

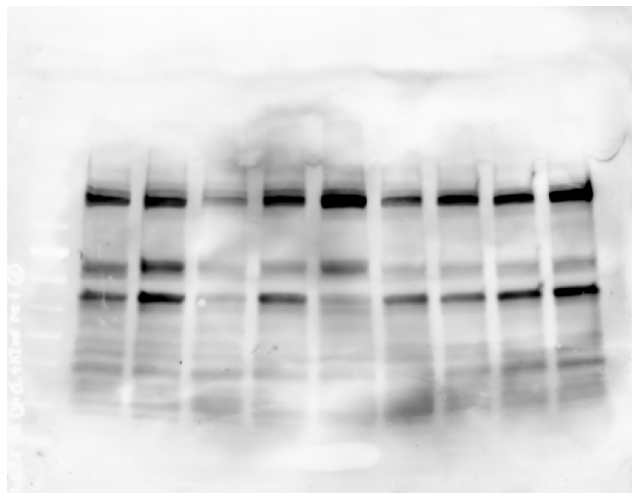

pERK1/2

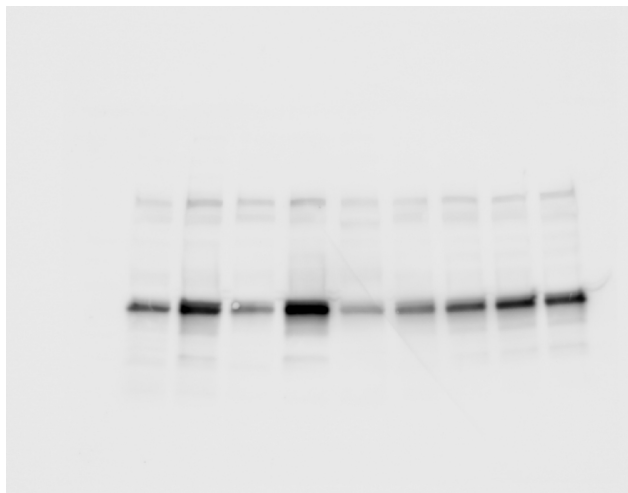

$\beta$ -Actin

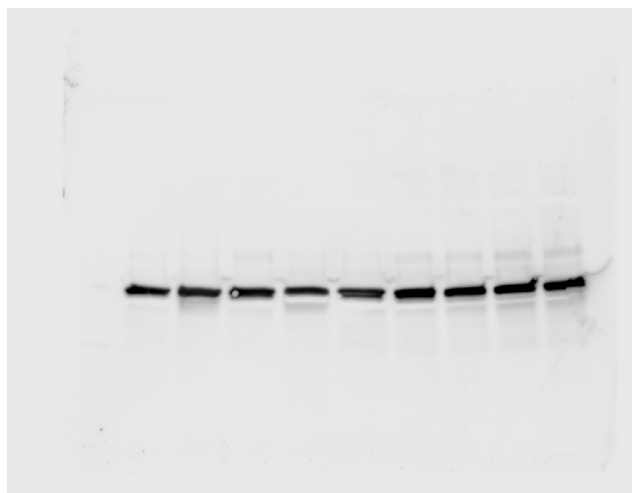

ERK1/2

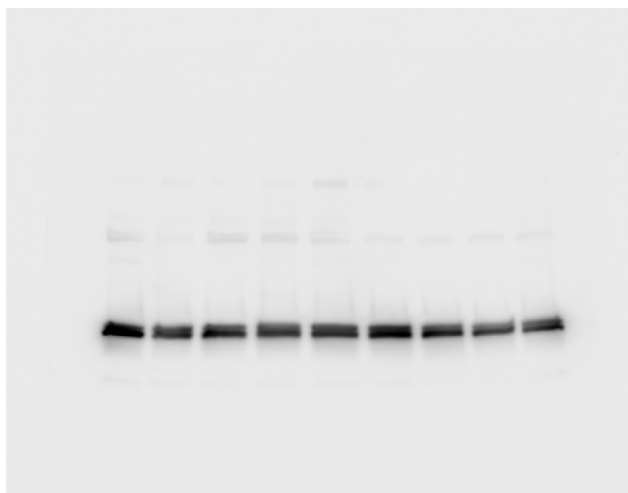

Vinculin

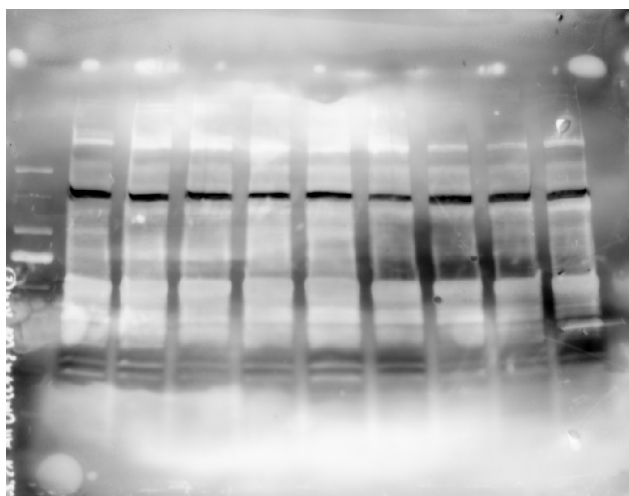

**Figure S4. Uncropped western blots for Fig. 5A.** Original pictures of the western blots shown in Fig. 5A.

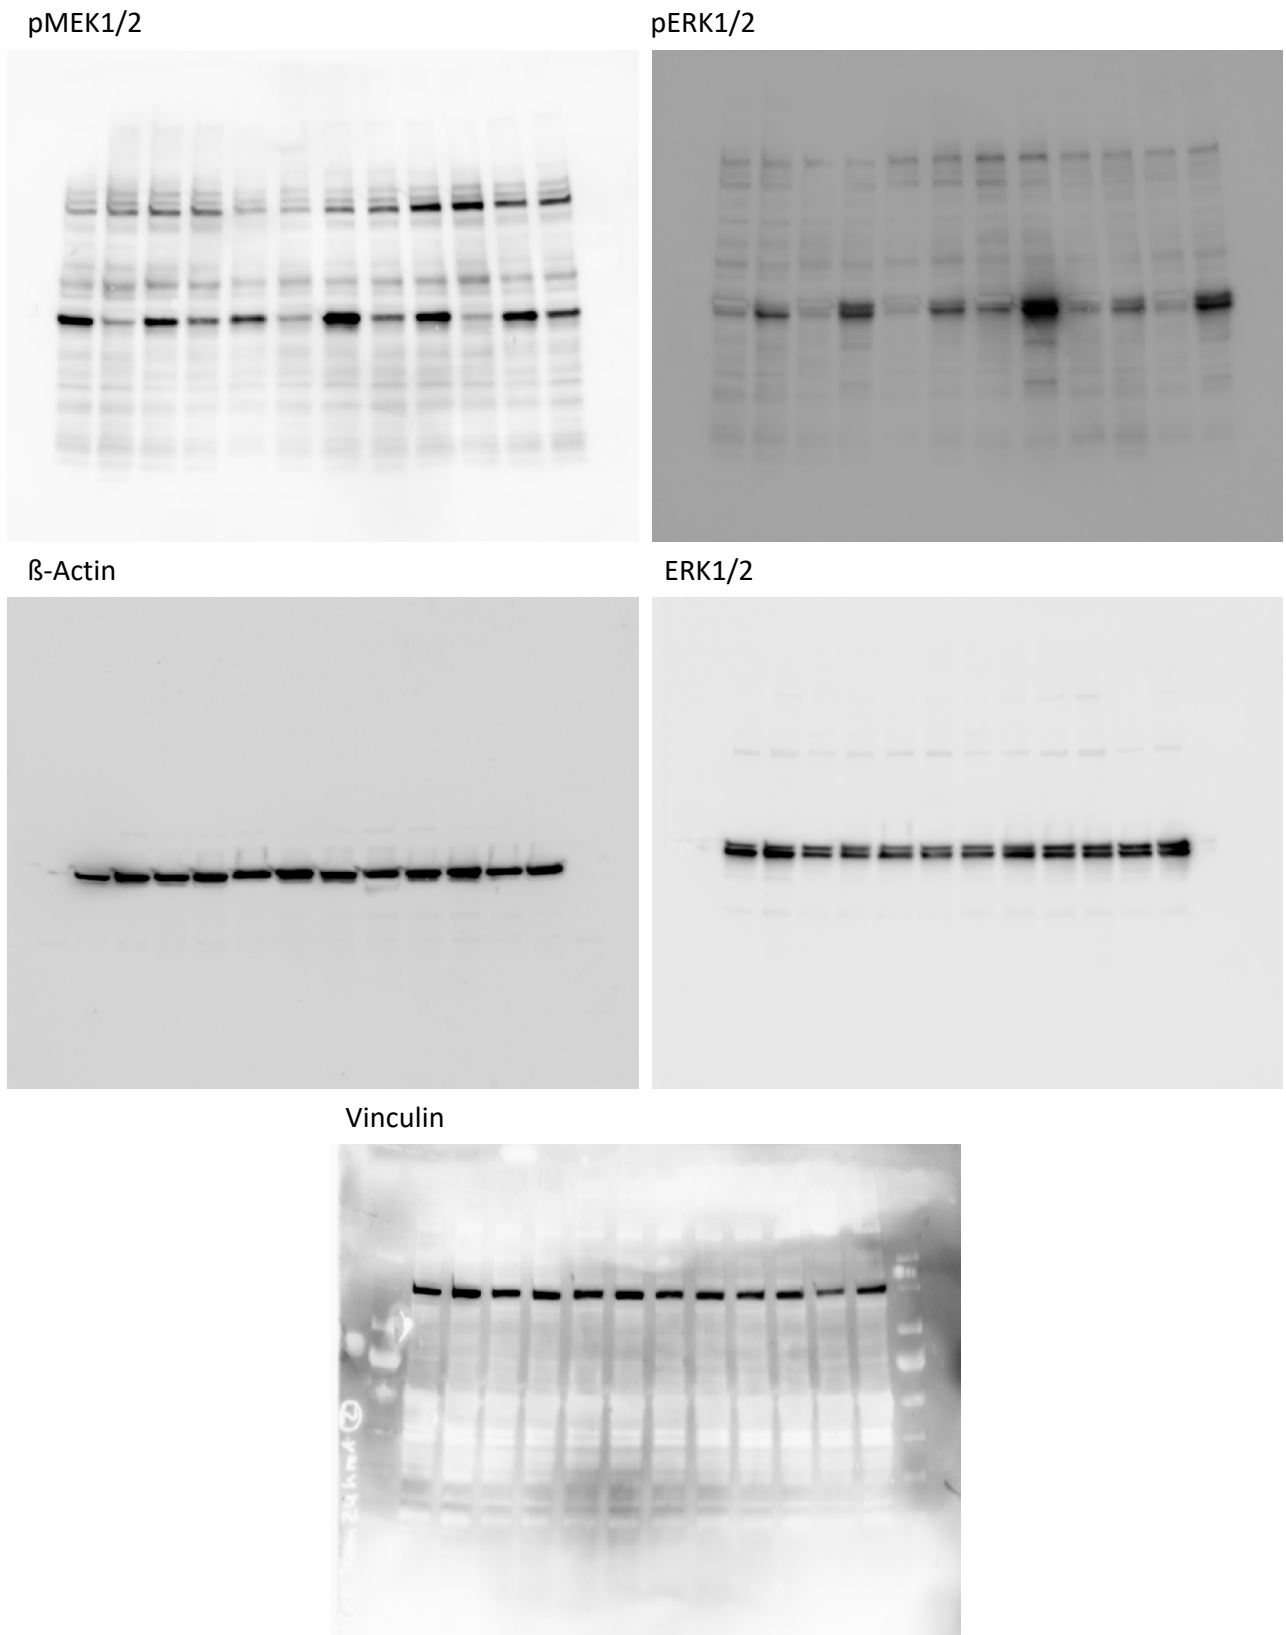

**Figure S5. Uncropped western blots for Fig. 5B.** Original pictures of the western blots shown in Fig. 5B.



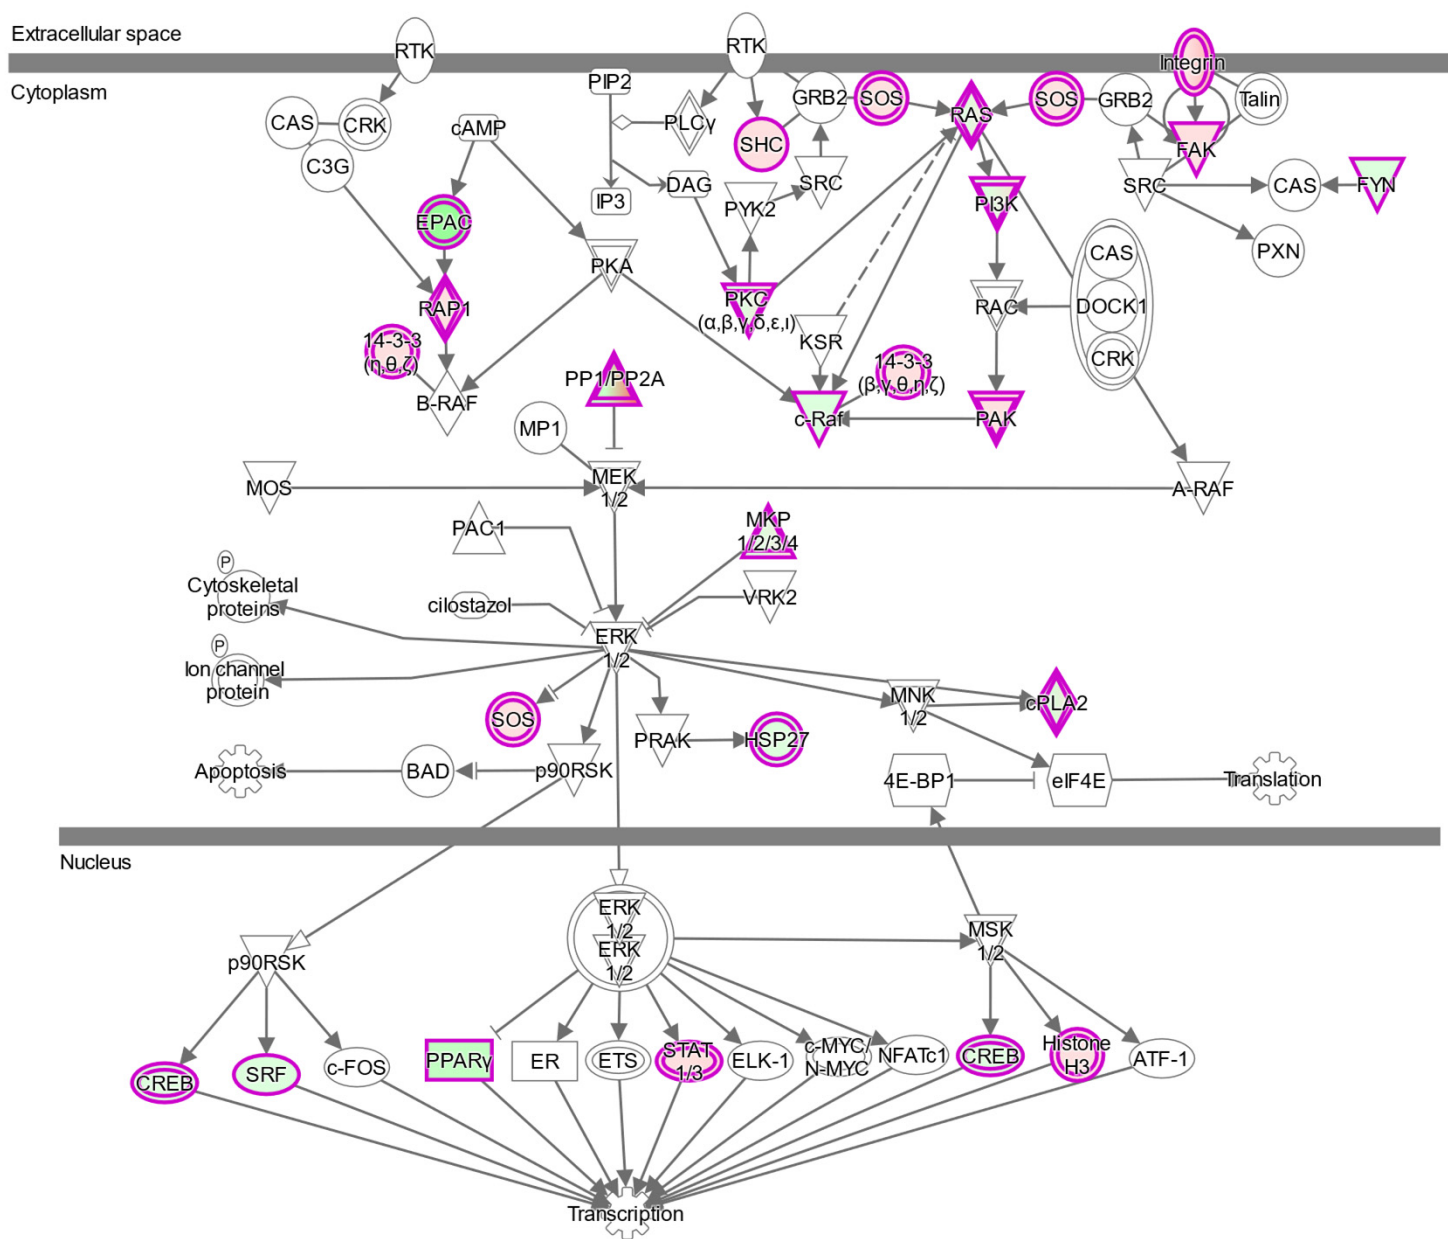

**Figure S7. ERK/MAPK Signaling.** Ingenuity Pathway Analysis shows upregulated genes in shades of red and downregulated genes in shades of green.

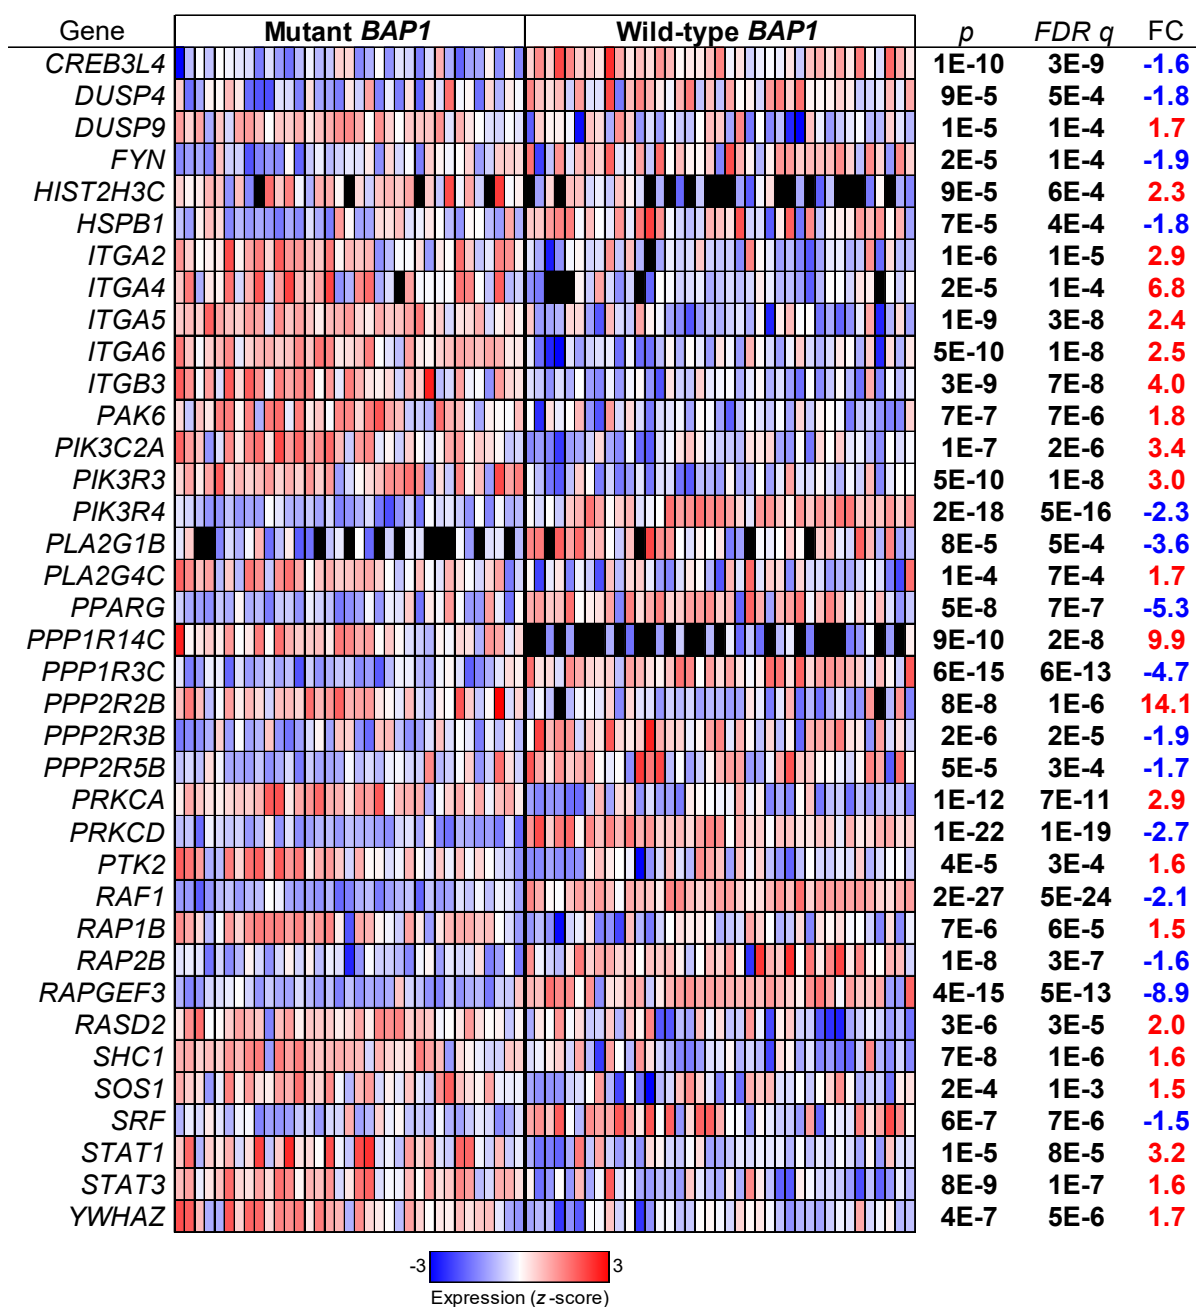

**Figure S8. ERK/MAPK signaling pathway genes in *BAP1*-mutant and *BAP1*-wild type UM tumor samples.** Uveal melanoma TCGA data ( $n=74$ ) was analyzed and grouped in *BAP1*-mutant and *BAP1*-wild type tumor samples. The genes of the ERK/MAPK signaling pathway that were differentially expressed after a false discovery rate (FDR) corrected  $p$  value below 0.001 and a fold change (FC) higher than 1.5 are shown.



**Supplementary Table S1. List of primers.**

| Primer name | Sequence 5'-3'           |
|-------------|--------------------------|
| EIF2A_F     | GACCCCAACCATACAAGGTGG    |
| EIF2A_R     | TTCTCCATAGTAGGAAGCTCCTG  |
| EIF4A2_F    | GAAGCCTTCCGCTATTCAGCA    |
| EIF4A2_R    | CTTGGGTCTCCTTGA ACTCAATC |
| PPIB_F      | GAGGAAAGAGCATCTACGGTG    |
| PPIB_R      | GCTTCTCCACCTCGATCTTG     |
| RAF1_F      | TGTTCCCCTCACAACACACAA    |
| RAF1_R      | CTGGGACTCCACTATCACCAATA  |
| RPS12_F     | TGCTGGAGGTGTAATGGACG     |
| RPS12_R     | GGCGCTTGTCTAAGGCTTTG     |
| WARS_F      | AAAGGCATTTTCGGCTTCACT    |
| WARS_R      | ATGGCACATGGGATAAGGCAC    |
